# Supplementary material
Source: Springer Nature journal article supplement (https://www.springermedizin.de/resource/supplementary/12943_2012_1024_MOESM6_ESM.pdf/9552128)
Supplement: MOESM6 [file 9552128]

**(A)**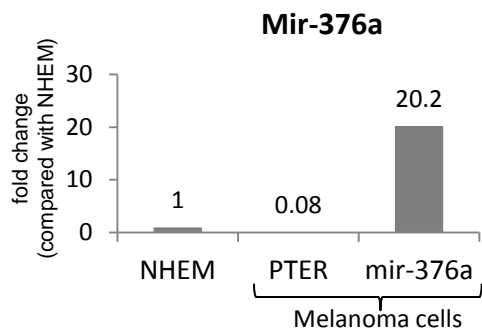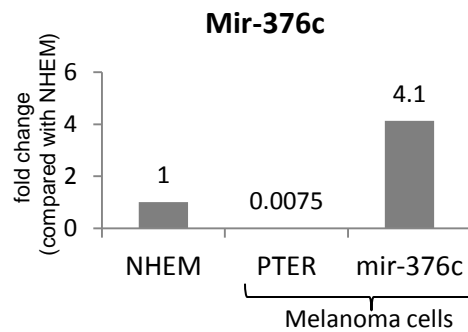**(B)**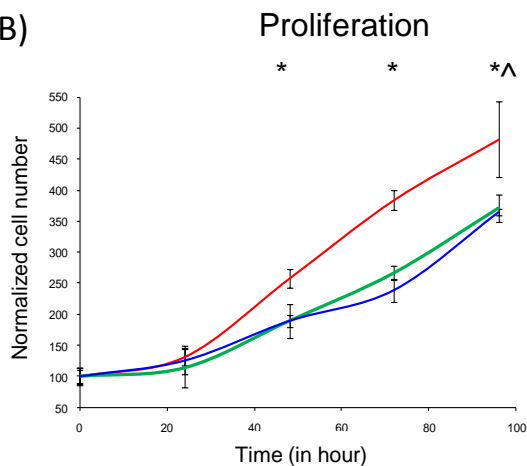**(C)**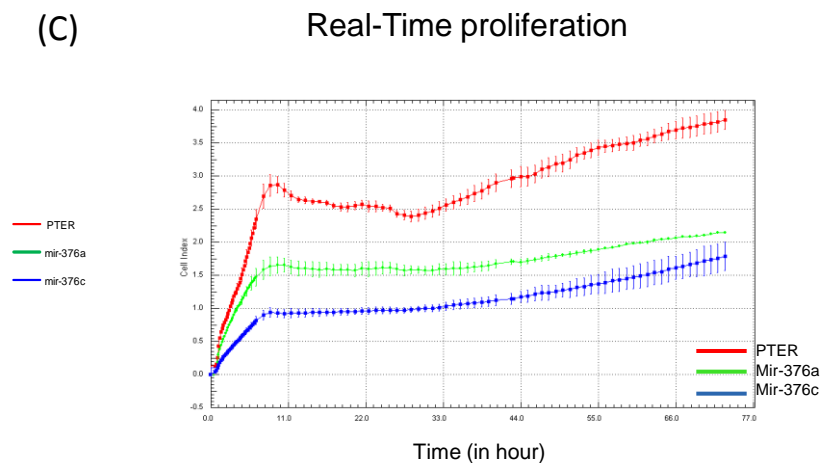**(D)****Transwell migration**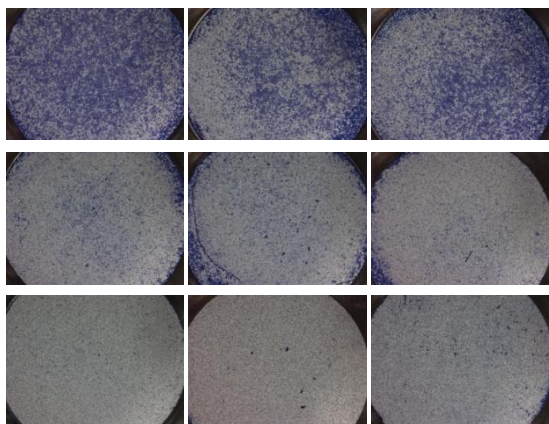**(E)****Real-Time migration**

Cell Index

Time (in hour)

— PTER  
— Mir-376a  
— Mir-376c

| Time (hour) | PTER  | Mir-376a | Mir-376c |
|-------------|-------|----------|----------|
| 0           | 0.0   | 0.0      | 0.0      |
| 3           | ~0.15 | ~0.12    | ~0.14    |
| 6           | ~0.18 | ~0.13    | ~0.14    |
| 9           | ~0.22 | ~0.13    | ~0.14    |
| 12          | ~0.26 | ~0.13    | ~0.14    |
| 15          | ~0.30 | ~0.13    | ~0.14    |
| 18          | ~0.34 | ~0.13    | ~0.14    |
| 21          | ~0.38 | ~0.13    | ~0.14    |
| 24          | ~0.42 | ~0.13    | ~0.14    |
| 27          | ~0.45 | ~0.13    | ~0.14    |
